# Supplementary material for: Metabolic Biomarkers Affecting Cell Proliferation and Prognosis in Polycythemia Vera
Source: MDPI journal article supplement (doi:10.3390/cancers14194913), 2022-10-07
Supplement: s1 [file s1]

Supplementary Files

# Metabolic Biomarkers Affecting Cell Proliferation and Prognosis in Polycythemia Vera

**Table S1.** Clinical characteristics of the PV patients.

| Descriptive Parameters              | PV (n=32)           | JAK2 mutated (n=24) | JAK2 unmutated (n=8) | <i>P</i> |
|-------------------------------------|---------------------|---------------------|----------------------|----------|
| Gender[n(%), female/male]           | 9 / 23              | 9 / 15              | 0 / 8                | 0.07     |
| Age[year, M(range)]                 | 54.5 (21~77)        | 64 (40~77)          | 38.5 (21~62)         | 0.001    |
| WBC[ $\times 10^9/L$ , M(range)]    | 7.595 (4.45, 20.95) | 9.35 (4.45, 20.95)  | 6.98 (4.59, 9.1)     | 0.151    |
| HGB[g/L, M(range)]                  | 190 (167, 223)      | 191 (167, 216)      | 182 (177, 223)       | 0.429    |
| PLT[ $\times 10^9/L$ , M(range)]    | 302 (111,752)       | 366 (111,752)       | 225.5 (157,394)      | 0.006    |
| HCT[% , M(range)]                   | 55.8 (49.8, 69)     | 57.2 (50.6, 69)     | 52.8 (49.8, 60.6)    | 0.044    |
| JAK2 mutation burden [% , M(range)] | -                   | 65.8 (10.4, 93.3)   | -                    | -        |
| JAK2 mutation[n(%)]                 | -                   | 24 (75)             | -                    | -        |
| JAK2 V617F mutation[n(%)]           | -                   | 22 (68.75)          | -                    | -        |
| JAK2 exon12 mutation[n(%)]          | -                   | 2 (6.25)            | -                    | -        |
| CALR mutation[n(%)]                 | 0 (0)               | -                   | -                    | -        |
| MPL mutation[n(%)]                  | 0 (0)               | -                   | -                    | -        |
| Diabetes [n(%)]                     | 2 (6.25)            | 1 (4.17)            | 1 (12.5)             | 0.444    |

PV: polycythemia vera; WBC: white blood cell count; HGB: hemoglobin; PLT: platelet count; NEUT: neutrophil count; HCT: hematocrit.

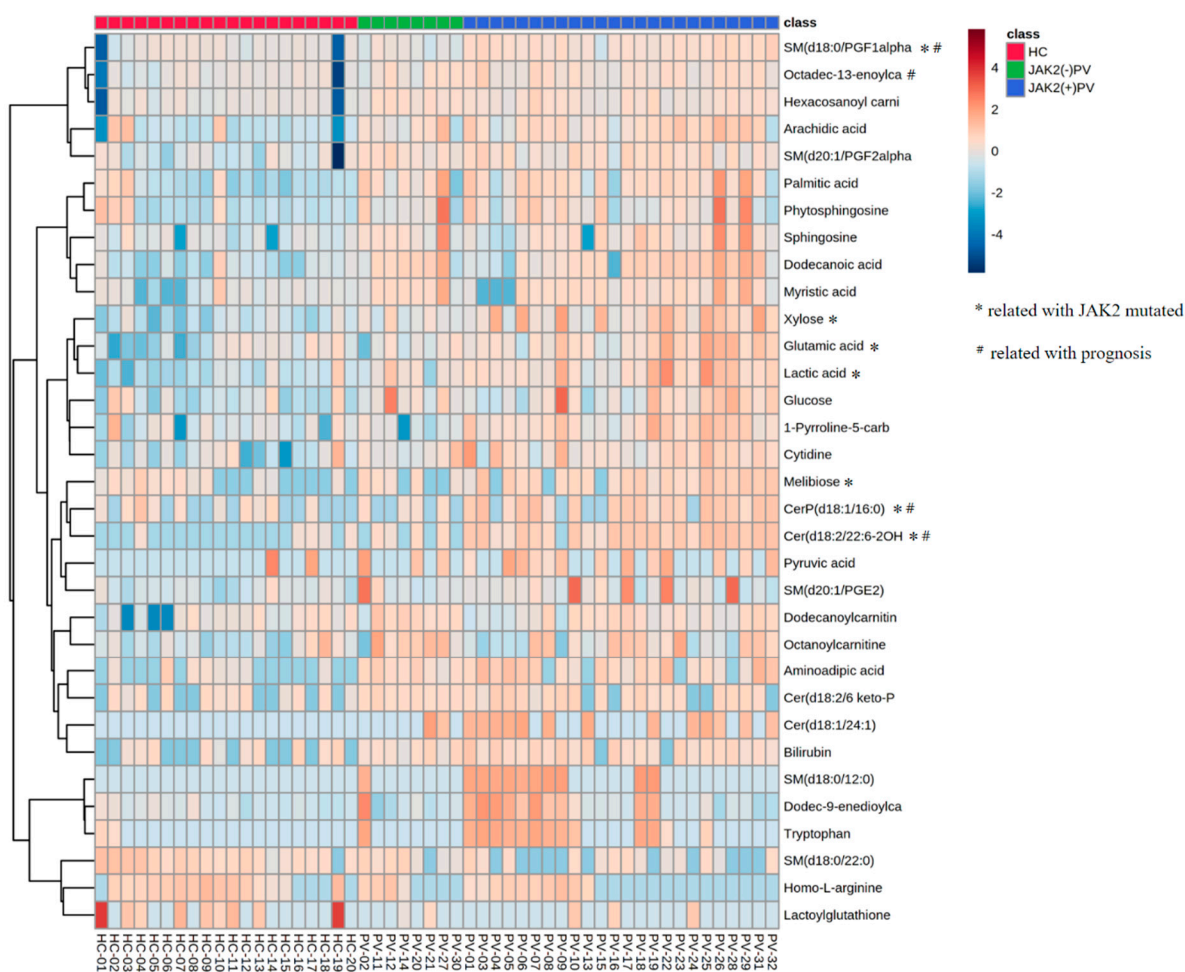

**Figure S1.** Hierarchical clustering heatmap of potential biomarkers for PV patients.

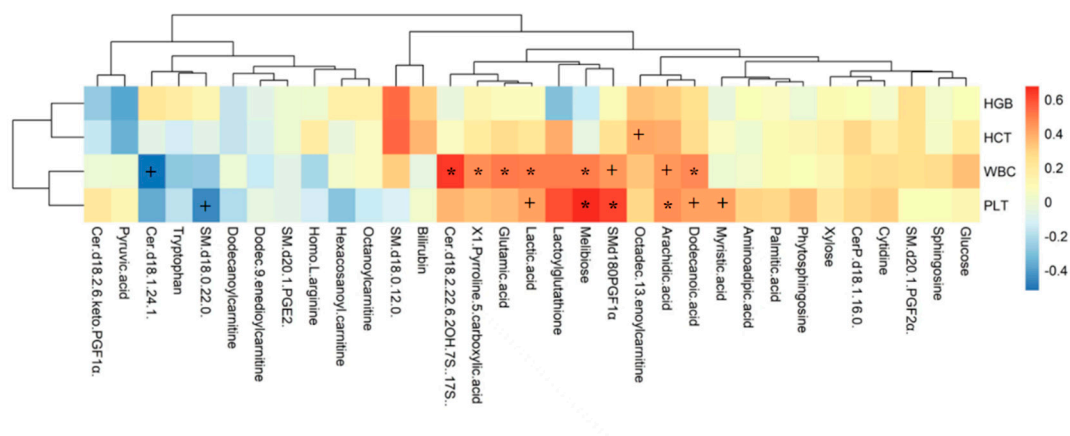

**Figure S2.** Heatmap of correlation between differential metabolites in PV patients and WBC, HGB, PLT and HCT at diagnosis. Spearman's correlation test, \*  $P < 0.05$ , \*  $P < 0.01$ .
